# Supplementary material for: Oxidation of SO2 to SO3 catalyzed by graphene oxide foams
Source: Royal Society of Chemistry journal article supplement (doi:10.1039/c1jm12031j), 2011-01-01
Supplement: c1jm12031j.pdf [file c1jm12031j.pdf]

Supporting information:

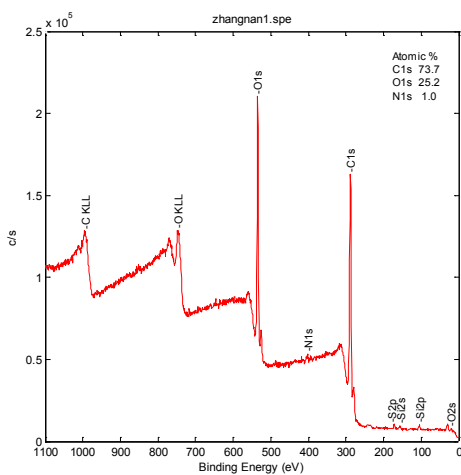

A

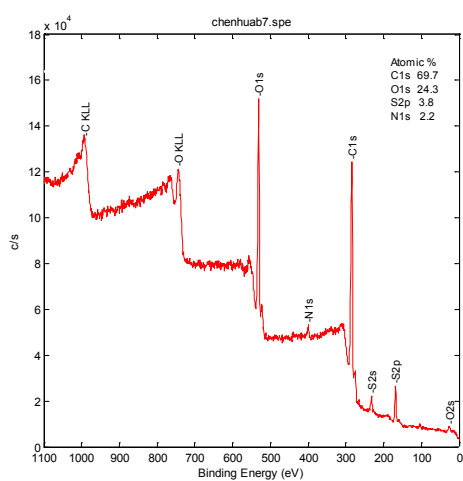

B1

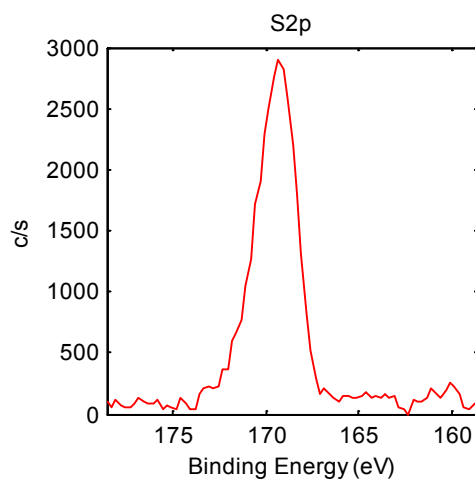

B2

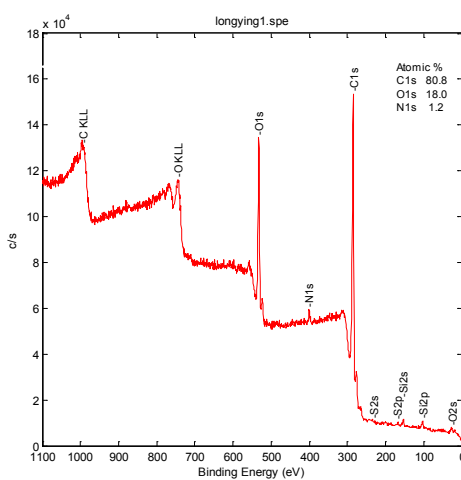

C

Figure S1. XPS spectra: wide region of GO (A), RFGO (B1) and RSGO (C);  
S<sub>2p</sub> XPS spectra of RFGO (B2)
